# Supplementary material for: IL-11 mediates the Radioresistance of Cervical Cancer Cells via the PI3K/Akt Signaling Pathway
Source: PubMed Central journal article supplement (PMC8210555; doi:10.7150/jca.56185), 2021-06-01

**Figure S1. Exogeneous IL-11 contributes to the radioresistance of Ect1 cells in vitro.** (A) Cell proliferation was detected by CCK-8 assays. (B) The cell-cycle phase distribution was analyzed 48 h after 6 Gy X-ray irradiation. (C) Cell apoptosis rates were determined by the Annexin V-FITC/PI binding assay 48 h after 6 Gy X-ray irradiation. \* $P < 0.05$ .

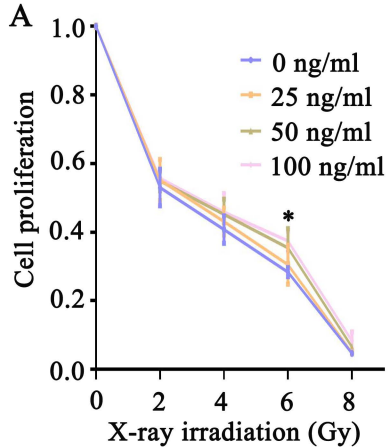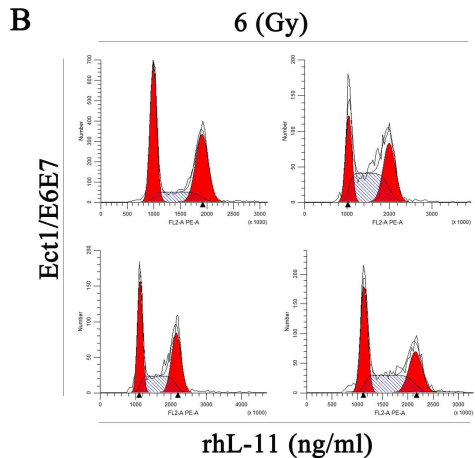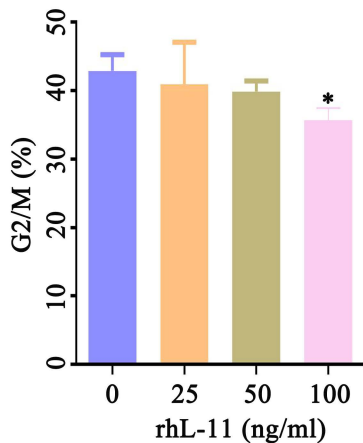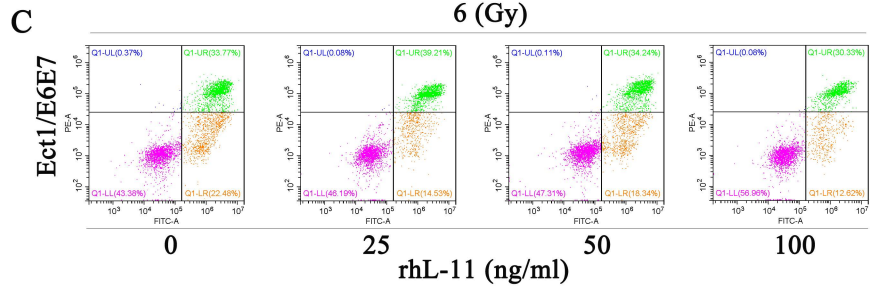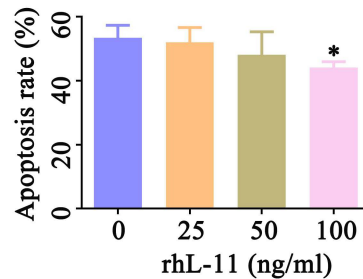

Supplement: jcav12p4638s1.pdf [file jcav12p4638s1.pdf]
